# Supplementary material
Source: Research Square preprint supplement (doi:10.21203/rs.3.rs-8946733/v1)
Supplement: Supplementary file 1 [file 5f2d34d5afffb5cae0698cf2.docx]

| Study (First Author, Year) | Confounding Bias | Selection Bias (in participant selection) | Intervention Classification Bias / Misclassification Bias (of intervention) | Bias due to deviations from intended interventions | Bias due to missing outcome data | Bias in measurement of the outcome | Selective reporting bias | Overall risk of bias judgement |
| --- | --- | --- | --- | --- | --- | --- | --- | --- |
| Lee2023 | Moderate | Moderate | Low | Moderate | Low | Low | Low | Moderate |
| Lee2026 | Moderate | Moderate | Low | Moderate | Low | Low | Low | Moderate |
| Song2021 | Moderate | Moderate | Low | Moderate | Low | Low | Low | Moderate |
| Tae2019 | Serious | Moderate | Low | Moderate | Low | Low | Low | Moderate to Serious |
| You2020 | Moderate | Moderate | Low | Moderate | Low | Low | Low | Moderate |
