# Supplementary material
Source: Research Square preprint supplement (doi:10.21203/rs.3.rs-8946733/v1)
Supplement: Supplementary file 2 [file a704049fe8f9392e7f9c4428.docx]

**(A)**

**
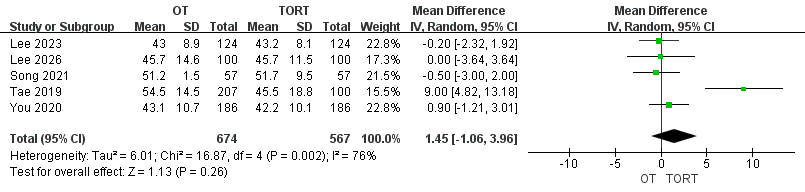
**

**(B)**

**
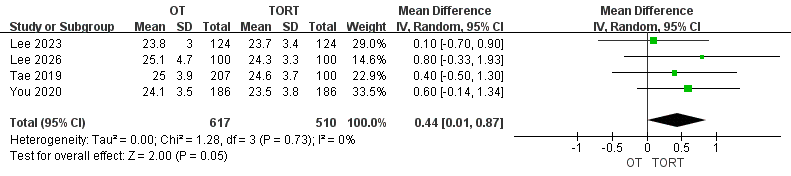
**

**(C)**

**
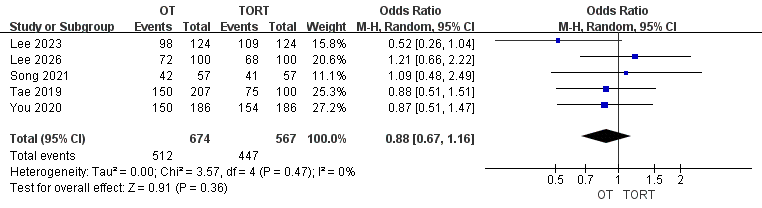
**

**(D)**

**
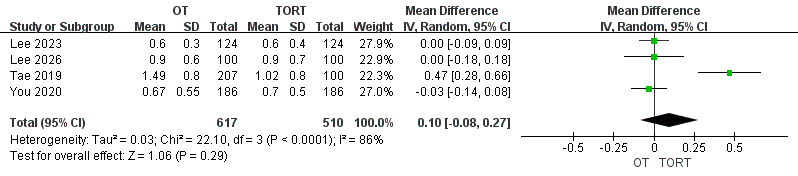
**

**(E)**

**
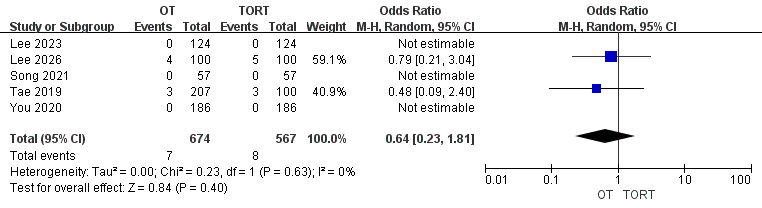
**

**(F)
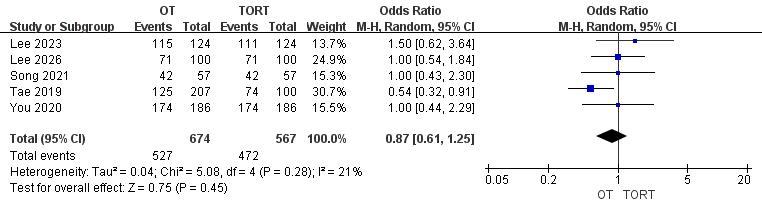
**

**(G)**

**
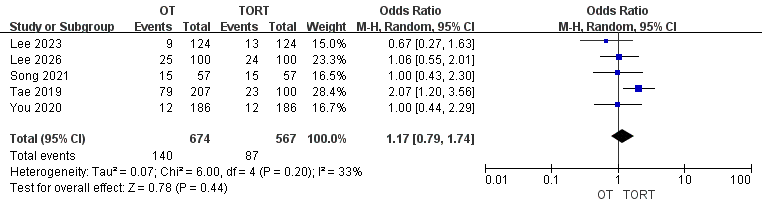
**

**(H)
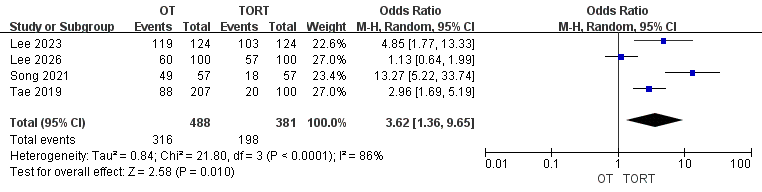
**

**(I)
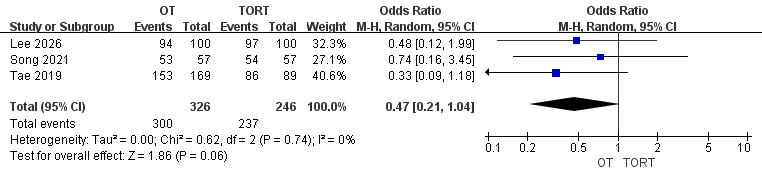
**

**(J)
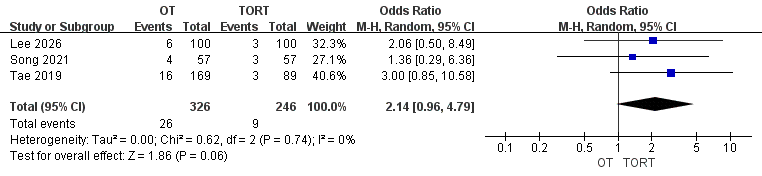
**

**(K)
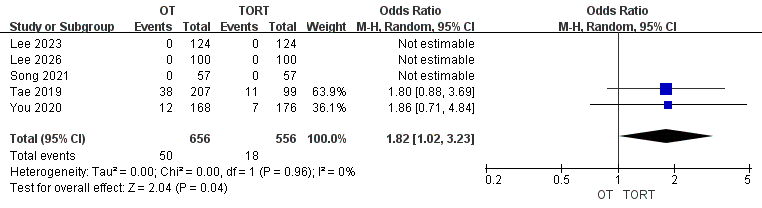
**

**(L)
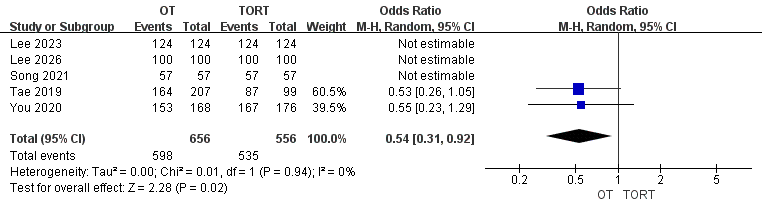
**

**(M)
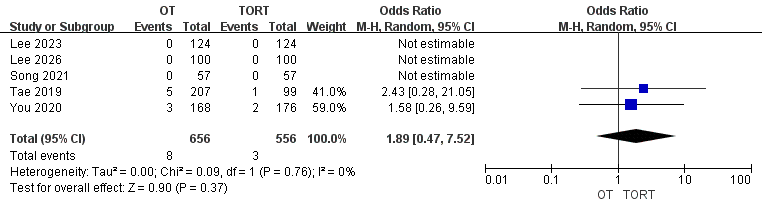
**

Forest plot of meta-analysis of the following variables: (A) age, (B) BMI, (C) Number of female, (D) Tumor size, (E) Isthmusectomy, (F) Lobectomy, (G) Total thyroidectomy, (H) Central neck dissection, (I) TNM Stage of I, (J) TNM Stage of II, (K) Benign tumor, (L) PTC,(L) FTC.
